# Supplementary material for: Knowledge translation of clinical practice guidelines among neurologists: A mixed-methods study
Source: PLOS journal article supplement (doi:10.1371/journal.pone.0205280), 2018-10-10
Supplement: S4 (10.1371/journal.pone.0205280.s004) [file journal.pone.0205280.s004]

| <b>Organization</b>                                                  | <b>N</b> | <b>CPGs</b>                                                                                                                                                                                                                                                                                                                                                                                                                                                                                                                                                                                                     |
|----------------------------------------------------------------------|----------|-----------------------------------------------------------------------------------------------------------------------------------------------------------------------------------------------------------------------------------------------------------------------------------------------------------------------------------------------------------------------------------------------------------------------------------------------------------------------------------------------------------------------------------------------------------------------------------------------------------------|
| American Academy of Neurology                                        | 117      | First seizure (n=16)<br>Headache, general (n=13)<br>Concussion (n=9)<br>Women with epilepsy (n=9)<br>Parkinson's disease, general (n=7)<br>Developmental delay (n=6)<br>Infantile spasm (n=6)<br>Essential tremor (n=6)<br>Neuropathy, general (n=5)<br>Stroke, general (n=5)<br>Muscular dystrophy (n=5)<br>Amyotrophic lateral sclerosis (n=4)<br>Epilepsy, general (n=3)<br>Epilepsy surgery (n=2)<br>Brain death (n=2)<br>Guillain Barre Syndrome (n=2)<br>Cannabis use (n=1)<br>Cerebral palsy (n=1)<br>Dementia (n=1)<br>Huntington's disease (n=1)<br>Status epilepticus (n=1)<br>Did not specify (n=13) |
| Canadian Heart and Stroke Foundation                                 | 51       |                                                                                                                                                                                                                                                                                                                                                                                                                                                                                                                                                                                                                 |
| American Heart Association/<br>American Stroke Association           | 32       |                                                                                                                                                                                                                                                                                                                                                                                                                                                                                                                                                                                                                 |
| Canadian Headache Society                                            | 19       |                                                                                                                                                                                                                                                                                                                                                                                                                                                                                                                                                                                                                 |
| Local guidelines                                                     | 16       |                                                                                                                                                                                                                                                                                                                                                                                                                                                                                                                                                                                                                 |
| Canadian Neurological Science Federation                             | 12       |                                                                                                                                                                                                                                                                                                                                                                                                                                                                                                                                                                                                                 |
| Canadian Parkinson's Disease                                         | 11       |                                                                                                                                                                                                                                                                                                                                                                                                                                                                                                                                                                                                                 |
| International League Against Epilepsy                                | 8        |                                                                                                                                                                                                                                                                                                                                                                                                                                                                                                                                                                                                                 |
| Canadian Multiple Sclerosis Society                                  | 7        |                                                                                                                                                                                                                                                                                                                                                                                                                                                                                                                                                                                                                 |
| National Institute of Health Excellence (United Kingdom)             | 7        |                                                                                                                                                                                                                                                                                                                                                                                                                                                                                                                                                                                                                 |
| Canadian consensus conference on diagnosis and treatment of dementia | 6        |                                                                                                                                                                                                                                                                                                                                                                                                                                                                                                                                                                                                                 |
| American Epilepsy Society                                            | 5        |                                                                                                                                                                                                                                                                                                                                                                                                                                                                                                                                                                                                                 |
| American Association of Neuromuscular & Electrodiagnostic Medicine   | 5        |                                                                                                                                                                                                                                                                                                                                                                                                                                                                                                                                                                                                                 |
| American College of Chest Physicians                                 | 5        |                                                                                                                                                                                                                                                                                                                                                                                                                                                                                                                                                                                                                 |
| Canadian Neuropathic Pain Society                                    | 5        |                                                                                                                                                                                                                                                                                                                                                                                                                                                                                                                                                                                                                 |

|                                              |    |  |
|----------------------------------------------|----|--|
| Canadian Medical Association                 | 4  |  |
| European Federation of Neurological Sciences | 4  |  |
| American Association of Pediatrics           | 3  |  |
| American Clinical Neurophysiologist          | 2  |  |
| International Headache Association           | 2  |  |
| Scottish Intercollegiate Guideline Network   | 1  |  |
| Other*                                       | 44 |  |

\*Other refers to those that were not relate to neurology or referred only to a condition for which the neurologists reported using CPGs.

*Footnote:* The topic of the CPGs for the organizations other than the American Academy of Neurology were not listed.
